## **Steric accessibility of the *N*-terminus improves the titer and quality of recombinant proteins secreted from *Komagataella phaffii***

Neil C. Dalvie<sup>1,2\*</sup>, Christopher A. Naranjo<sup>2\*</sup>, Sergio A. Rodriguez-Aponte<sup>2,3\*</sup>, Ryan S. Johnston<sup>2</sup>, J. Christopher Love<sup>1,2^</sup>

<sup>1</sup>Department of Chemical Engineering, Massachusetts Institute of Technology, Cambridge, MA 02139

<sup>2</sup>The Koch Institute for Integrative Cancer Research, Massachusetts Institute of Technology, Cambridge, MA 02139

<sup>3</sup>Department of Biological Engineering, Massachusetts Institute of Technology, Cambridge, MA 02139

\*Contributed equally

^Correspondence to [clove@mit.edu](mailto:clove@mit.edu)

## Abstract

*Background:* *Komagataella phaffii* is a commonly used alternative host for manufacturing therapeutic proteins, in part because of its ability to secrete recombinant proteins into the extracellular space. Incorrect processing of secreted proteins by cells can, however, cause non-functional product-related variants, which are expensive to remove in purification and lower overall process yields. The secretion signal peptide, attached to the *N*-terminus of the recombinant protein, is a major determinant of the quality of the protein sequence and yield. In *K. phaffii*, the signal peptide from the *Saccharomyces cerevisiae* alpha mating factor often yields the highest secreted titer of recombinant proteins, but the quality of secreted protein can vary highly.

*Results:* We determined that an aggregated product-related variant of the SARS-CoV-2 receptor binding domain is caused by *N*-terminal extension from incomplete cleavage of the signal peptide. We eliminated this variant and improved secreted protein titer up to 76% by extension of the *N*-terminus with a short, functional peptide moiety or with the EAEA residues from the native signal peptide. We then applied this strategy to three other recombinant subunit vaccine antigens and observed consistent elimination of the same aggregated product-related variant. Finally, we demonstrated that this benefit in quality and secreted titer can be achieved with addition of a single amino acid to the *N*-terminus of the recombinant protein.

*Conclusions:* Our observations suggest that steric hindrance of proteases in the Golgi that cleave the signal peptide can cause unwanted *N*-terminal extension and related product variants. We demonstrated that this phenomenon occurs for multiple recombinant proteins, and can be addressed by minimal modification of the *N*-terminus to improve steric accessibility. This strategy will enable consistent secretion of a broad range of recombinant proteins with the highly productive alpha mating factor secretion signal peptide.

## Background

Secreting heterologous recombinant proteins into the extracellular medium during fermentation of microbial organisms can intensify processes for production, and in turn reduce operational costs and complexities [1]. Secretion of proteins by cells also enables alternative operating modes like perfusion for continuous processing, and simplifies subsequent recovery of the protein from culture supernatant instead of cellular lysates [2–4].

Canonical cellular processes for secreting proteins in eukaryotic microorganisms requires translocation of the translated protein. An *N*-terminal polypeptide sequence directs translocation of the protein to the endoplasmic reticulum (ER) from which the protein is ultimately transported via vesicles through the Golgi and to the cell's surface [5]. The nature of these ‘signal’ peptides, along with the features of the heterologous protein itself, can vary the production yields, primary, secondary, or tertiary structures, and post-translational modifications. Proteins with *N*-terminal truncations or extensions, proteolytic cleavage, or aberrant N- or O-linked glycosylation may be non-functional, immunogenic, prone to aggregation, or unstable in formulation [6]. These product-related variants are often challenging to remove by affinity chromatography and typically require additional process operations like ion exchange or hydrophobic interaction chromatography [7–9]. To maximize the benefits of continuous production of proteins by secretion and subsequent intensification in recovery, it is essential to minimize heterogeneity in the proteins produced by the host cells.

The yeast *Komagataella phaffii* (*Pichia pastoris*) is a common alternative host with high potential for low-cost manufacturing of therapeutic proteins like vaccine antigens and monoclonal antibodies [10,11]. It has a highly developed secretory pathway, grows quickly to high cell densities, and can be easily genetically modified [12–14]. The most commonly used signal peptide to direct secretion of recombinant proteins in *K. phaffii* is the  $\alpha$ -mating factor signal peptide ( $\alpha$ SP) from *Saccharomyces cerevisiae*, which comprises a 19 amino acid [pre] sequence and a 67 amino acid [pro] sequence, which terminates in a Glu-Ala-Glu-Ala (EAEA) motif [15,16]. In *S. cerevisiae*, the [pre] sequence is removed in the endoplasmic reticulum, the [pro] sequence, which includes multiple sites for *N*-glycosylation, is removed by the KEX2 protease in the Golgi; the STE13 protease removes the residual EAEA amino acids at the N-terminus of the secreted  $\alpha$ -mating factor [17].

In *K. phaffii*, however, efficient processing of the  $\alpha$ SP can depend on the recombinant heterologous protein used. Improper or inefficient cleavage of the signal peptide can impact the secreted titer of the correct recombinant protein or create product variants like *N*-terminal extension or truncation [18–21]. Secretion of recombinant human interferon- $\alpha$ 2b, for example, resulted in incomplete removal of the *N*-terminal EAEA residues [22]. In this case, the KEX2 cleavage site was sufficient to cleave the [pro] signal peptide when EAEA was removed from the coding sequence [3]. Indeed, the EAEA residues have often been omitted from the  $\alpha$ SP when used for secretion of recombinant proteins from *K. phaffii* [19,23,24]. Despite inconsistent *N*-terminal processing and design practices, the *S. cerevisiae*  $\alpha$ SP remains the signal peptide most commonly used in *K. phaffii* because very few alternative signal peptides have resulted in consistently higher product quality or secreted titers of recombinant protein [24–26]. Refined understanding of the requirements for efficient processing of the  $\alpha$ SP in *K. phaffii* would, therefore, enhance designs to improve protein secretion in this host.

Here, we evaluated the impact of signal peptide processing on the quality and secreted titer of several recombinant therapeutic proteins, and tested approaches to minimize variations by altering the EAEA motif. We observed that an aggregated product-related variant of the SARS-CoV-2 receptor binding domain (RBD) can result from *N*-terminal extension from incomplete processing of the signal peptide. We eliminated this product variant and increased secreted titers by steric extension of the *N*-terminus of the RBD first by a functional peptide and the  $\alpha$ SP-EAEA residues, and then tested whether or not similar benefits could be obtained using only single amino acids. Finally, we demonstrated that extension of the *N*-terminus of three other subunit vaccine antigens by  $\alpha$ SP-EAEA residues or a peptide epitope also eliminates an aggregated product-related variant. Together, these results provide evidence from multiple examples of recombinant proteins for how inefficient cleavage of the signal peptide can lead to variations of different quality attributes of the proteins, and suggest some strategies for improving protein quality with minimal sequence modifications.

## Results

### *Incomplete cleavage by KEX2 leads to protein aggregation*

High-molecular weight species or aggregated recombinant proteins can impact final yields and may be hard to remove since they may have similar biophysical features as properly folded protein [27]. We previously reported manufacturing of the SARS-CoV-2 receptor binding domain (RBD), a promising candidate subunit vaccine antigen for COVID-19, in *K. phaffii* [28,29]. We observed a high-molecular weight species (RBD-HMW) in purified RBD samples purified by ion exchange chromatography. We developed one strategy to reduce these species by engineering the RBD sequence to reduce the intrinsic aggregation of the molecule [30]. Nonetheless, we still observed RBD-HMW after purification with this engineered version.

We therefore sought to further investigate features of the RBD-HMW. We separated the RBD-HMW from monomeric RBD by SEC (Fig. 1A), and treated the RBD-HMW with PNGase. This treatment showed the RBD-HMW (~70-100 apparent kDa) comprised several distinct species of approximately ~30 kD (Fig. 1B). These data showed the formation of the RBD-HMW species depends on N-glycosylation. We next analyzed the intact mass of these species by liquid chromatography mass spectrometry (LCMS) and observed that these polypeptides retained portions of the  $\alpha$ SP (Fig. 1C). These included residual deglycosylated fragments of the [pro] region of the  $\alpha$ SP, ranging from 9 to 66 amino acids (Table 1). While the recombinant RBD molecule contains only one N-linked glycosylation site (N12), the fragment of the [pro] peptide appended to the *N*-terminus contains three additional canonical sites for N-linked glycosylation. The  $\alpha$ SP also contains a predicted sites for O-linked glycosylation (T25, NetOGlyc 4.0), and we observed O-glycosylation of the *N*-terminal extensions (Fig. 1C).

**Table 1. *N*-terminal extensions of the RBD (amu).**

| N-terminal signal peptide extensions                              | Theoretical mass of extension | Theoretical mass of RBD + extension after PNGase treatment | Measured mass | Error |
|-------------------------------------------------------------------|-------------------------------|------------------------------------------------------------|---------------|-------|
| (none)                                                            | N/A                           | 22582.41                                                   | 22582.43      | 0.02  |
| EEGVSLEKR                                                         | 1028.13                       | 23610.54                                                   | 23610.36      | -0.18 |
| AKEEGVSLEKR                                                       | 1227.38                       | 23809.79                                                   | 23809.72      | -0.07 |
| SIAAKEEGVSLEKR                                                    | 1498.69                       | 24081.11                                                   | 24079.86      | -1.25 |
| FINTTASIAAKEEGVSLEKR                                              | 2259.58                       | 24842.00                                                   | 24842.89      | 0.89  |
| SNSTNNGLLFINTTASIAAKEEGVSLEKR                                     | 3160.53                       | 25744.92                                                   | 25745.42      | 0.50  |
| APVNTTTEDETAQIPAEAVIGYSDLEGDFDVAVLPFSNSTNNGLLFINTTASIAAKEEGVSLEKR | 6938.62                       | 29524.00                                                   | 29524.7       | 0.70  |

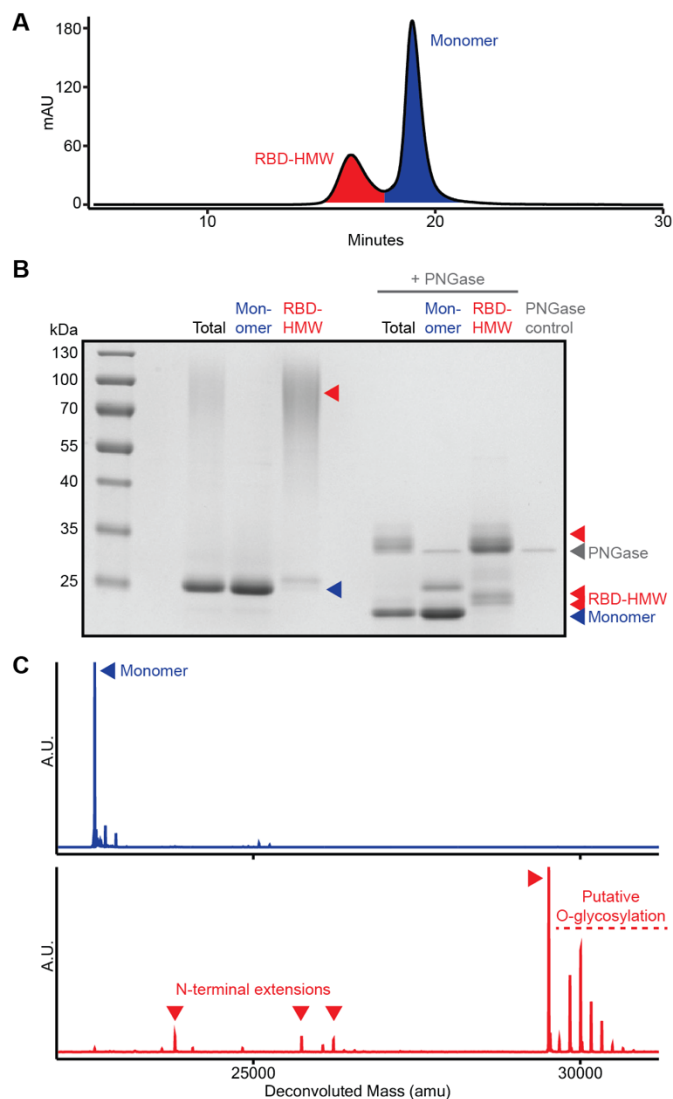

### Fig. 1. Aggregated product-related variant is caused by *N*-terminal extension

A) Separation of the aggregated RBD variant from monomeric RBD by size exclusion chromatography. B) Reduced SDS-PAGE of purified RBD and each fraction after separation by size exclusion chromatography. C) Intact LCMS of each RBD fraction.

#### *N*-terminal modification eliminates *N*-terminal extension

Next, we investigated if *N*-terminal extensions were evident in other engineered variations of the RBD. Specifically, we assessed the quality of RBD antigens expressed in *K. phaffii* that were genetically modified to include a 13 amino acid SpyTag peptide, a motif for transpeptidation useful to link proteins onto other proteins modified with SpyCatcher, such as protein nanoparticles [31,32]. We appended the SpyTag peptide to either the *C*-terminus (RBD-SpyTag) or the *N*-terminus (SpyTag-RBD) of the RBD antigen with a flexible linker sequence GGDGGDGGDGG. Interestingly, we observed the RBD-HMW only in purified RBD-SpyTag (Fig. 2A). We confirmed

this observation by LCMS, and the observed *N*-terminal extensions similar to the unmodified RBD (Fig. 2B). SpyTag-RBD, on the other hand, exhibited no detectable *N*-terminal extensions, suggesting that the endogenous KEX2 protease fully processes the [pro] peptide when fused to SpyTag-RBD. We reasoned that protrusion of the SpyTag peptide from the *N*-terminus of the folded RBD molecule may allow KEX2 protease improved steric access to the dibasic cleavage motif (KR). Indeed, inspection of the predicted structure of the SpyTag-RBD suggested that the *N*-terminus of SpyTag-RBD may be more exposed than the *N*-terminus of unmodified RBD (Fig. S1).

Based on our observations with SpyTag-RBD, we hypothesized that complete cleavage of the signal sequence by KEX2 could eliminate *N*-terminal extension and the RBD-HMW. To facilitate cleavage by KEX2, we re-inserted the EAEA motif natively found in the *S. cerevisiae*  $\alpha$ SP cleavage site (KR-EAEA) to the *N*-terminus of both RBD-SpyTag and SpyTag-RBD. As expected, addition of EAEA eliminated the RBD-HMW that was previously observed in purified RBD-SpyTag (Fig. 2A). We also performed LCMS to confirm the absence of *N*-terminal extensions for both antigens expressed with EAEA (Fig. 2B). Interestingly, the EAEA residues remained at the *N*-terminus of the RBD-SpyTag antigen, but were removed from the SpyTag-RBD antigen. During processing of the native  $\alpha$ SP in *S. cerevisiae*, these residues are removed by the protease STE13 [15]. We hypothesized that the protrusion of the *N*-terminus of the protein afforded by the SpyTag peptide reduced steric interference from the folded RBD itself, allowing efficient access and cleavage by the STE13 protease in *K. phaffii*. Of note, we also consistently observed removal of the *C*-terminal lysine residue for antigens with SpyTag appended at the *C*-terminus (Fig. 2B). In our experience, however, this variant does not impact the efficiency of conjugation to SpyCatcher or the performance of RBD-SpyTag as a vaccine antigen [30].

In addition to assessing the impact of SpyTag and EAEA residues on product quality, we also assessed the yield of the antigens produced by *K. phaffii*. We observed an increase in secreted titer of the RBD antigens modified with EAEA residues (Fig. 2C). We observed the largest titer improvement from 62 mg/L to 109 mg/L (~76% increase) upon adding EAEA residues to the RBD-SpyTag, which also eliminated the RBD-HMW. We previously hypothesized that RBD antigens that tend to aggregate after purification may also aggregate inside the *K. phaffii* secretory pathway (and in turn trigger a secretory stress response and lower the secreted titer) [30]. Interestingly, we also observed an improvement in secreted titer from 59 mg/L to 81 mg/L (~36%)



when we added EAEA residues to the SpyTag-RBD, despite observing no *N*-terminal extension and no aggregation of the original SpyTag-RBD. This observation suggests that, in addition to reducing product-related variants, efficient cleavage of the  $\alpha$ SP by KEX2 may generally enhance the secretion of recombinant proteins from *K. phaffii*.

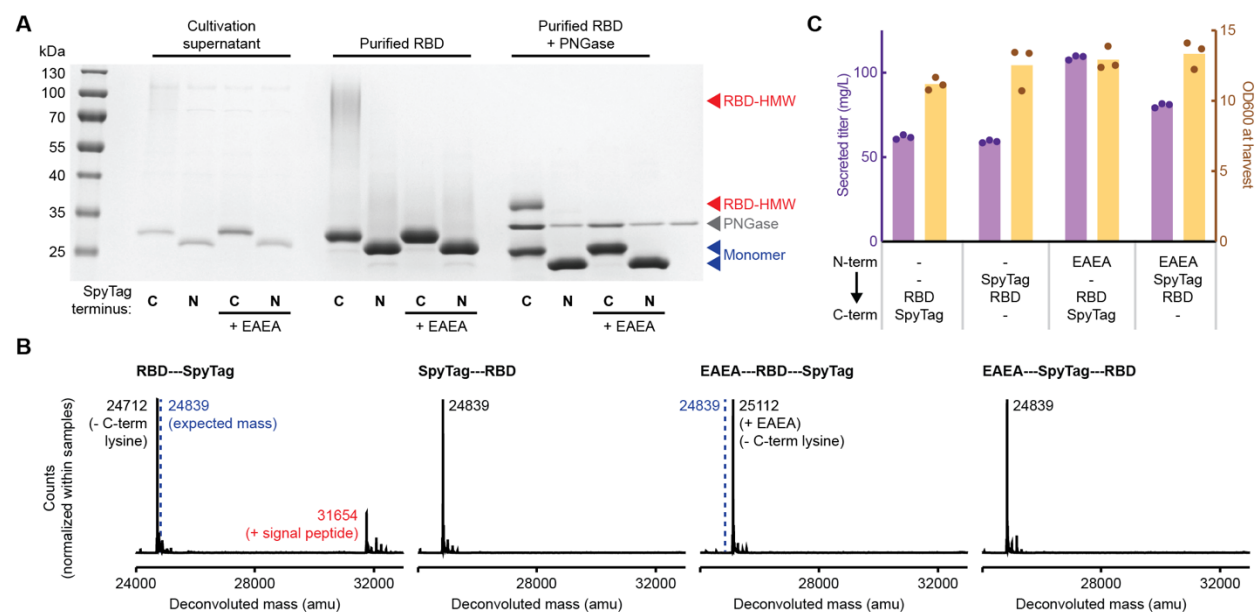

**Fig. 2. Addition of residues to the *N*-terminus eliminates *N*-terminal extension.**

A) Reduced SDS-PAGE of unpurified supernatant and purified variants of the RBD. B) Intact LCMS of purified RBD variants. C) Secreted titer and cell density of strains producing RBD variants with different *N*-terminal sequences. Cells were cultivated at 3 mL scale for one day of outgrowth and one day of production. Bars represent the average of three independent cultures.

### *N*-terminal engineering of rotavirus subunit antigens

Next, we sought to determine whether or not these findings were specific only to the RBD. We previously reported the manufacturing of an engineered trivalent subunit vaccine for rotavirus in *K. phaffii* [18]. In this vaccine design, each of the three truncated VP8 antigens (P[4], P[6], and P[8]) was genetically linked to a tetanus toxoid epitope (P2) to enhance the immunogenicity of the vaccine [33]. We hypothesized that P2, which is 15 amino acids and attached by a small flexible linker, would enable efficient cleavage of the  $\alpha$ SP by KEX2 protease from P[4], P[6], and P[8],



similar to the effect observed with the SpyTag peptide for the SARS-CoV-2 RBD. To test this hypothesis, we expressed each engineered VP8 antigen with and without the P2 epitope, and with and without the  $\alpha$ SP EAEA residues (Fig. 3A). For the P[4] and P[8] antigens, we observed that the addition of the P2 epitope, the  $\alpha$ SP EAEA residues, or both, to the *N*-terminus of the proteins eliminated HMW species evident in culture supernatants; in contrast, unmodified antigens tended to form HMW species. In our previous work, we found P[6] antigen secreted at 4-10x lower titers than P[4] and P[8] [18]. In this study, appending the P2 epitope, the  $\alpha$ SP EAEA residues, or both to the *N*-terminus did not substantially improve the titers of the P[6] antigen, but there was no detectable P[6] antigen when there was no *N*-terminal modification. We hypothesize that the unmodified P[6] may also form HMW species, but that the HMW species was not present at a high enough concentration for detection by SDS-PAGE. These data also further corroborate that intrinsic differences in the sequence of the P[6] antigen itself contribute to the poor titers observed relative to the other two serotypes tested here [18].

To determine if the HMW variant of the rotavirus VP8 subunits was similar to the HMW variant of the SARS-CoV-2 RBD, we evaluated the primary structure of the four versions of the P[4] antigen (P2-P[4], EAEA-P2-P[4], P[4], and EAEA-P[4]). We cultivated each strain in shake flasks and purified the secreted antigens. First, we treated the P[4]-HMW protein with PNGase, and observed several distinct HMW species, similar to the RBD-HMW (Fig. 3B). Next, we performed intact LCMS on each P[4] variant (Fig. 3C). We observed that the P[4]-HMW species from the unmodified P[4] antigen comprised *N*-terminal extensions, which is consistent with our previous observations of the RBD-HMW. Over 70% of the purified P[4] comprised P[4]-HMW species by LCMS. We noticed, additionally, that EAEA residues remained when appended to the *N*-terminus of the P[4] antigen, but were removed by STE13 protease when appended to the *N*-terminus of the P2 epitope. Indeed, the apparent molecular weights of P2-P[4/6/8] and EAEA-P2-P[4/6/8] observed by SDS-PAGE were the same for all three antigens (Fig. 3A). Finally, we observed *N*-terminal truncation of the P2 epitope itself (Fig. 3C). We previously have observed these truncated variants of P2-P[4], and we hypothesized that this truncation is mediated by a native serine protease from *K. phaffii*. Interestingly, this observation is also consistent with our hypothesis here: that reducing steric hinderance at the *N*-terminus of the P2 epitope improves its accessibility and consequently renders higher protease activity. Indeed, we did not observe any *N*-terminal truncation of the EAEA-P[4] antigen, which lacks the P2 epitope. Together, these results

suggest that protrusion of the *N*-terminus away from the folded structure of the protein facilitates efficient protease activity, reducing aberrant *N*-terminal extension and aggregation of multiple recombinant secreted proteins.

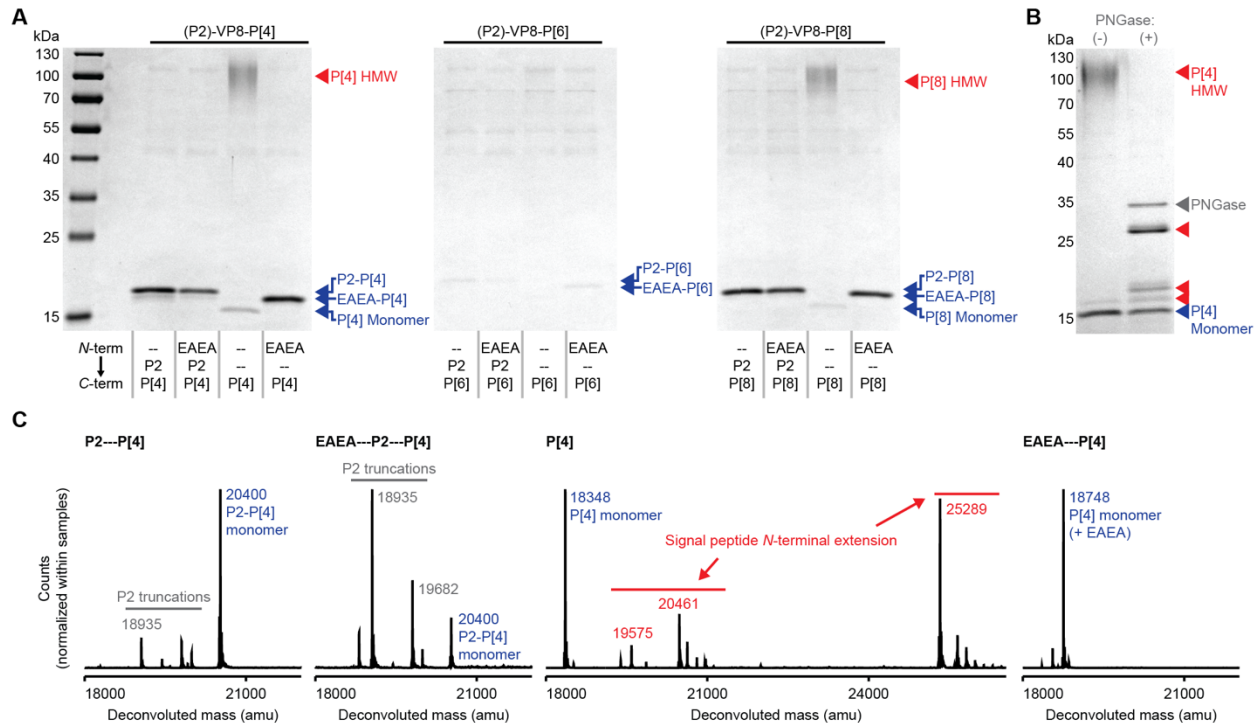

**Fig. 3. *N*-terminal modification of rotavirus VP8 antigens.**

A) Reduced SDS-PAGE of unpurified supernatant of variants of P[4], P[6], and P[8] antigens. B) Reduced SDS-PAGE of purified P[4] with no *N*-terminal modification. C) Intact LCMS of purified P[4] variants.

### *Elimination of aberrant N-terminal extension with minimal N-terminal engineering*

Throughout this study, we observed that the EAEA residues often remained on the secreted protein when placed directly adjacent to the globular RBD or VP8 proteins (Fig. 2B, 3B). For some vaccine antigens, EAEA residues may be an acceptable modification to the sequence of a candidate drug substance, given the large improvements in both the quality and titer of the secreted product. EAEA could, however, present potential risks or perceived concerns of unwanted immunogenicity

for other parenteral therapeutic proteins. We sought, therefore, to determine the minimal number of residues necessary to eliminate *N*-terminal variants containing a full or partial signal peptide.

We expressed the unmodified RBD antigen using the  $\alpha$ SP with different numbers of EA repeats as well as different single amino acids at the *N*-terminus. We observed that addition of a single EA repeat or a single E residue conferred a similar increase in the secreted titer of the RBD compared to the unmodified RBD antigen (Fig. 4A). Additional EA repeats did not appear to further improve the titer or quality of the RBD antigen. Interestingly, we observed that most single amino acids were sufficient to eliminate the RBD-HMW species (Fig. 4B,C). One notable exception was proline, which appears to increase the abundance of the RBD-HMW. We hypothesize that KEX2 is unable to cleave KR-P. Some amino acids like tryptophan and cysteine did reduce the secreted titer of the RBD, which we hypothesize was due to conformational changes from the large size of tryptophan or dimerization of the RBD from addition of a free cysteine residue. Based on these observations, addition of a small, charged or polar amino acid to the *N*-terminus of the RBD appears to confer the same benefit that we observed with the EAEA residues.

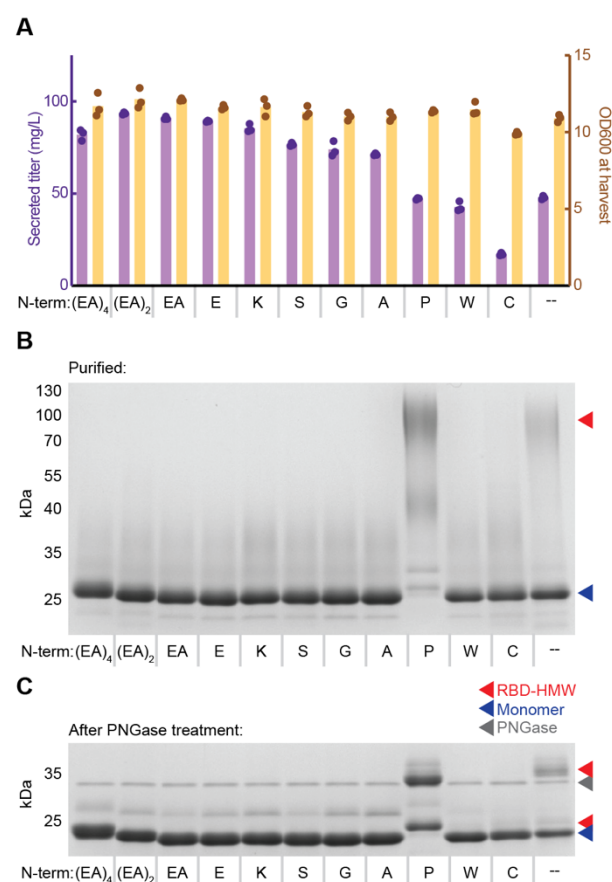

**Fig. 4. Single amino acids eliminate *N*-terminal extension.**

A) Secreted titer and cell density of strains producing RBD variants with different *N*-terminal sequences. Cells were cultivated at 3 mL scale for one day of outgrowth and one day of production. Bars represent the average of three independent cultures. B) Reduced SDS-PAGE of purified RBD variants. C) Reduced SDS-PAGE of purified RBD variants after treatment with PNGase.

## Discussion

We determined that a prominent product-related variant of the SARS-CoV-2 RBD secreted from yeast is caused by incomplete cleavage of the  $\alpha$ SP. We noticed that attachment of an additional peptide sequence to the *N*-terminus of the RBD abrogated this variant, which suggested that steric accessibility of the *N*-terminus of the recombinant protein to KEX2, which cleaves the [pro]  $\alpha$ SP in the Golgi, may determine the extent of *N*-terminal extension (Fig. 5). We also demonstrated that this phenomenon was consistent for a different set of subunit vaccine antigens, with a different peptide moiety attached to the *N*-terminus. These data together suggest that efficient cleavage of the [pro]  $\alpha$ SP occurs when the site for cleavage in the *N*-terminus is not sterically occluded by globular domains.

We also showed the insertion of the  $\alpha$ SP EAEA residues can also eliminate these *N*-terminal variants. Others have demonstrated that mutation of the +1 residue of the KEX2 cleavage site may impact signal peptide processing and improve the secreted titer of recombinant proteins [34]. In most studies that evaluate the impact of the EAEA residues, however, the residues remain on the recombinant protein; that is, cleavage of the EAEA residues by STE13 does not occur [19,20]. These reports are consistent, therefore, with our hypothesis that protrusion of the *N*-terminus outside the folded protein domain may also facilitate cleavage by KEX2, in addition to extension of the recognized cleavage site [35]. Indeed, addition of an *N*-terminal leader sequence has been shown by others to improve secreted productivity [36].

Finally, we demonstrated that including a single amino acid to the *N*-terminus of a recombinant protein confers similar benefits in quality and secreted titer as the complete EAEA motif. Parenteral biopharmaceuticals produced in bacteria like *Escherichia coli*—including ones given for chronic indications like diabetes—include a *N*-terminal methionine that is necessary to initiate protein translation [37]. This precedent suggests that drug substances produced in *K. phaffii* could invoke a similar insertion with minimal risk or impact on clinical use. Our data here suggest further that this inclusion could provide additional benefits by minimizing *N*-terminal variations and enhancing titers of the heterologous protein, and that the flexibility of selecting among charged, polar, or small amino acids for the *N*-terminal extension could avoid other potential product-related variations like the oxidation of methionine, which is a common quality attribute measured for bacterially-expressed drug substances [38].

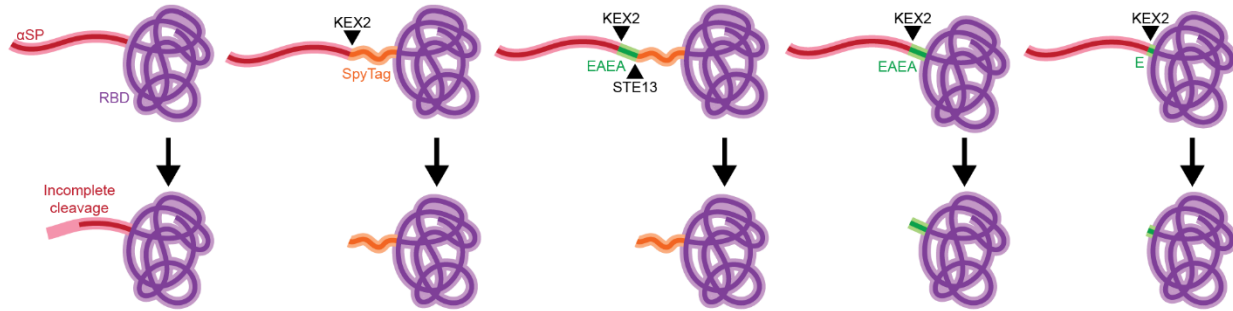

**Fig. 5. Schematic of *N*-terminal steric accessibility.**

### Conclusions

In this study, we determined that an aggregated product-related variant of several recombinant proteins secreted from *K. phaffii* was caused by incomplete cleavage of the secretion signal peptide. We eliminated this variant by genetic addition of amino acids or short peptide moieties to the *N*-terminuses of the recombinant proteins. We hypothesize that these modifications reduce steric obstruction of the proteases KEX2 and STE13, which process the  $\alpha$ SP. These observations suggest that steric accessibility of the *N*-terminus can determine quality and yield of a broad range of recombinant proteins produced in *K. phaffii*.

## Materials and methods

### *Yeast strains*

All strains were derived from wild-type *Komagataella phaffii* (NRRL Y-11430), in a modified base strain (RCR2\_D196E, RVB1\_K8E) described previously [39]. All RBD sequences were based on an engineered version of the RBD described previously (RBD-L452K-F490W), and were transformed as described previously [14,30]. Modifications of the RBD including EAEA, peptide moieties, and single amino acids were made by KLD site directed mutagenesis (New England Biolabs). Rotavirus antigens were designed based on optimized sequences described previously, ordered from Codex DNA, and assembled on a BioXP into the same custom vector as the RBD [18]. All plasmid sequences are found in the Supplemental Information.

### *Cultivations*

Strains for initial characterization and titer measurement were grown in 3 mL culture in 24-well deep well plates (25°C, 600 rpm), and strains for protein purification were grown in 100 mL culture in 500 mL shake flasks (25°C, 300 rpm). Cells were cultivated in complex media (potassium phosphate buffer pH 6.5, 1.34% nitrogen base without amino acids, 1% yeast extract, 2% peptone). Cells were inoculated at 0.1 OD<sub>600</sub>, outgrown for 24 h with 4% glycerol feed, pelleted, and resuspended in fresh media with 1% methanol and 40 g/L sorbitol to induce recombinant gene expression. Supernatant samples were collected and filtered after 24 h of production. Supernatant titers were measured by reverse phase liquid chromatography as described previously [30]. Purification of the RBD and rotavirus antigens was performed as described previously [18,30].

### *Analytical assays for protein characterization*

Purified protein concentrations were determined by absorbance at A<sub>280</sub> nm. SDS-PAGE was performed under reducing conditions using Novex 12% Tris-Glycine Midi Gels (Thermo Fisher Scientific, Waltham, MA). Separation was performed at 125V for 90 minutes. Gels were stained using Instant Blue Protein Stain (Abcam Inc, United Kingdom), and destained with deionized water for a total of three washes prior to imaging.



### *Size exclusion chromatography*

Purified RBD protein was separated using a Superose™ 6 Increase 10/300 GL column (Cytiva Life Sciences, catalog no. 29091596) on an ÄKTA Pure 25-L FPLC system (Cytiva Life Sciences, catalog no. 29018224). The column was equilibrated with 3 CVs of a buffer composed of 50 mM sodium phosphate and 150 mM NaCl (pH 7.4) at a rate of 0.25 ml/min. Approximately 1000µg of protein diluted to 500µL with buffer was injected onto the column. One CV of buffer was applied to the column at a rate of 0.25 ml/min for sample elution, and fractions of 0.5mL were collected. All fractions corresponding to each peak were pooled together, concentrated using Pierce™ Protein Concentrator PES, 10K MWCO, 2-6 mL (Thermo Scientific, catalog no. 88516), and the final protein concentration was measured via A280 absorbance.

### *Mass spectrometry*

Approximately 40-80ug of total protein was digested with PNGaseF, glycerol-free (New England BioLabs, catalog no. P0705L) according to the manufacture's recommended protocol. Intact mass analysis was performed on a 6530B quadrupole time-of-flight liquid chromatograph mass spectrometer (LC-MS) equipped with a dual ESI source and a 1290 series HPLC (Agilent Technologies, Santa Clara, CA). Mobile phase A consisted of LCMS grade water with 0.1% formic acid, and mobile phase B was LCMS grade acetonitrile with 0.1% formic acid. About 1.0 µg of protein for each sample was injected, bound to a ZORBAX RRHD 300SB-C3 column (2.1 mm × 50 mm, 300 Å, 1.8 µm) (Agilent Technologies, Santa Clara, CA), desalted, and subjected to electrospray ionization. The LC gradient comprised 5% to 95% B over 4 min at a flow rate of 0.8 mL/min. A blank injection using the same LC method between each sample was performed as a wash step. The electrospray ionization parameters were as follows: 350 °C drying gas temperature, 10 L/min drying gas flow, 30 psig nebulizer, 4,000 V capillary voltage, and 250 V fragmentor voltage. Mass spectra were collected in MS mode (0 V collision energy) from 500 to 3,200 m/z at a scan rate of 1 spectra/s. MS spectra were processed using MassHunter BioConfirm software (vB.10.0, Agilent Technologies) using the Maximum Entropy deconvolution algorithm, a mass step of 1 Da, and a mass range of within 50,000 amu appropriate to each protein sample analyzed. For quantitative analysis of the identified P[4]-HMW protein species in the summed mass spectra, area under the curve for each deconvoluted mass peak was used for percent calculations relative to total P[4]-related mass peaks.



### Competing Interests

N.C.D., S.A.R., and J.C.L. have filed a patent related to the RBD-L452K-F490W sequence. J.C.L. has interests in Sunflower Therapeutics PBC, Honeycomb Biotechnologies, OneCyte Biotechnologies, QuantumCyte, Amgen, and Repligen. J.C.L.'s interests are reviewed and managed under MIT's policies for potential conflicts of interest.

### Funding

This work was funded by the Bill and Melinda Gates Foundation (Investment ID INV-002740). This study was also supported in part by the Koch Institute Support (core) Grant P30-CA14051 from the National Cancer Institute. N.C.D. was supported by a graduate fellowship from the Ludwig Center at MIT's Koch Institute. The content is solely the responsibility of the authors and does not necessarily represent the official views of the NCI or the Bill and Melinda Gates Foundation.

### Author's contributions

N.C.D., C.A.N., S.A.R., and J.C.L. conceived and planned experiments. N.C.D., C.A.N., and R.S.J. generated and characterized yeast strains. S.R.A. performed HPLC assays and protein purifications. C.A.N. performed PNGase treatment and mass spectrometry. N.C.D., C.A.N., S.A.R., and J.C.L. wrote the manuscript.

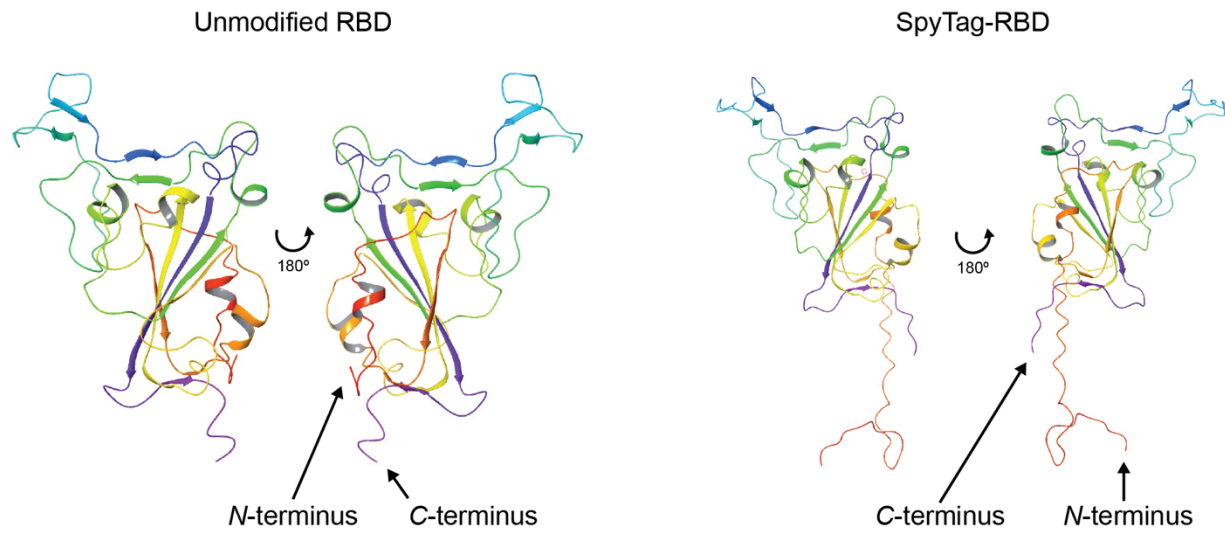

**Fig. S1. Structural rendering of unmodified RBD and SpyTag-RBD.**

## References

1. Davy AM, Kildegaard HF, Andersen MR. Cell Factory Engineering. Cell Syst [Internet]. Elsevier; 2017 [cited 2017 Oct 26];4:262–75. Available from: <http://www.ncbi.nlm.nih.gov/pubmed/28334575>
2. Karst DJ, Steinebach F, Morbidelli M. Continuous integrated manufacturing of therapeutic proteins. Curr Opin Biotechnol. Elsevier Ltd; 2018. p. 76–84.
3. Crowell L, Lu A, Love KR, Stockdale A, Timmick SM, Wu D, et al. Pharmacy-scale, on-demand manufacturing of clinical-quality biopharmaceuticals (Accepted for publication). 2018;
4. Versteegen R, Plavsic M, Nims R, Klostermann R, Hemmerich K. Trends & Developments in BioProcess Technology Trends & Developments in BioProcess Technology A Production of BioProcess Technology Network A Production of BioProcess Technology Network BioProcessing BioProcessing Gamma Irradiation of Animal Serum: An Int. Bioprocess J [Internet]. 2016 [cited 2020 Jul 27];15. Available from: [www.bioprocessingjournal.com](http://www.bioprocessingjournal.com)
5. Delic M, Valli M, Graf AB, Pfeiffer M, Mattanovich D, Gasser B. The secretory pathway: exploring yeast diversity. 2013;
6. Conley GP, Viswanathan M, Hou Y, Rank DL, Lindberg AP, Cramer SM, et al. Evaluation of protein engineering and process optimization approaches to enhance antibody drug manufacturability. Biotechnol Bioeng [Internet]. Wiley-Blackwell; 2011 [cited 2018 Jul 30];108:2634–44. Available from: <http://doi.wiley.com/10.1002/bit.23220>
7. Crowell LE, Lu AE, Love KR, Stockdale A, Timmick SM, Wu D, et al. On-demand manufacturing of clinical-quality biopharmaceuticals. Nat Biotechnol [Internet]. Nature Publishing Group; 2018 [cited 2019 Apr 29];36:988. Available from: <http://www.nature.com/doi/10.1038/nbt.4262>
8. Vecchiarello N, Goodwine C, Crowell LE, Love KR, Cramer SM, Love JC. A combined screening and in-silico strategy for rapidly designing orthogonally selective integrated downstream processes for removing process and product-related impurities. (Manuscript in preparation). 2018;
9. Love JC, Love KR, Barone PW. Enabling global access to high-quality biopharmaceuticals. Curr Opin Chem Eng [Internet]. 2013 [cited 2017 Sep 21];2:383–90. Available from: <http://dx.doi.org/10.1016/j.coche.2013.09.002>
10. Love KR, Dalvie NC, Love JC. The yeast stands alone: the future of protein biologic

production. *Curr Opin Biotechnol* [Internet]. Elsevier Current Trends; 2018 [cited 2018 Jul 29];53:50–8. Available from:

<https://www.sciencedirect.com/science/article/pii/S095816691730191X>

11. Shekhar C. Pichia Power: India’s Biotech Industry Puts Unconventional Yeast to Work. *Chem Biol* [Internet]. Cell Press; 2008 [cited 2017 Sep 28];15:201–2. Available from:

<http://www.sciencedirect.com/science/article/pii/S1074552108000902>

12. Matthews CB, Wright C, Kuo A, Colant N, Westoby M, Love JC. Reexamining opportunities for therapeutic protein production in eukaryotic microorganisms. *Biotechnol Bioeng* [Internet]. 2017 [cited 2017 Oct 27];114:2432–44. Available from:

<http://doi.wiley.com/10.1002/bit.26378>

13. Kang Z, Huang H, Zhang Y, Du G, Chen J. Recent advances of molecular toolbox construction expand Pichia pastoris in synthetic biology applications. *World J Microbiol Biotechnol* [Internet]. Springer Netherlands; 2017 [cited 2017 Feb 2];33:19. Available from:

<http://link.springer.com/10.1007/s11274-016-2185-2>

14. Dalvie NC, Leal J, Whittaker CA, Yang Y, Brady JR, Love KR, et al. Host-Informed Expression of CRISPR Guide RNA for Genomic Engineering in *Komagataella phaffii*. *ACS Synth Biol* [Internet]. 2019 [cited 2020 Jan 7];acssynbio.9b00372. Available from:

<https://pubs.acs.org/doi/10.1021/acssynbio.9b00372>

15. Joo HH, Xue L, Tsai JW, Park SPJ, Kwon J, Patel A, et al. Structural characterization of the  $\alpha$ -mating factor prepro-peptide for secretion of recombinant proteins in Pichia pastoris. *Gene*. Elsevier; 2017;598:50–62.

16. Ahmad M, Hirz M, Pichler H, Schwab H. Protein expression in Pichia pastoris: recent achievements and perspectives for heterologous protein production. 2014;

17. Lin-Cereghino GP, Stark CM, Kim D, Chang J, Shaheen N, Poerwanto H, et al. The effect of  $\alpha$ -mating factor secretion signal mutations on recombinant protein expression in Pichia pastoris. *Gene* [Internet]. 2013 [cited 2017 Aug 6];519:311–7. Available from: [http://ac.els-cdn.com/S0378111913001765/1-s2.0-S0378111913001765-main.pdf?\\_tid=f7679ae0-7a6c-11e7-a356-00000aacb35f&acdnat=1501999589\\_effea0477067650f0f6169542322136c](http://ac.els-cdn.com/S0378111913001765/1-s2.0-S0378111913001765-main.pdf?_tid=f7679ae0-7a6c-11e7-a356-00000aacb35f&acdnat=1501999589_effea0477067650f0f6169542322136c)

18. Dalvie NC, Brady JR, Crowell LE, Tracey MK, Biedermann AM, Kaur K, et al. Molecular engineering improves antigen quality and enables integrated manufacturing of a trivalent subunit vaccine candidate for rotavirus. *Microb Cell Fact* [Internet]. BioMed Central Ltd; 2021 [cited

- 2021 Jun 30];20:1–14. Available from: <https://doi.org/10.1186/s12934-021-01583-6>
19. Raemaekers RJM, Muro L de, Gatehouse JA, Fordham-Skelton AP. Functional phytohemagglutinin (PHA) and Galanthus nivalis agglutinin (GNA) expressed in *Pichia pastoris*. *Eur J Biochem* [Internet]. John Wiley & Sons, Ltd; 1999 [cited 2021 Sep 16];265:394–403. Available from: <https://onlinelibrary.wiley.com/doi/full/10.1046/j.1432-1327.1999.00749.x>
20. Kozlov DG, Yagudin TA. Antibody fragments may be incorrectly processed in the yeast *Pichia pastoris*. *Biotechnol Lett* 2008 309 [Internet]. Springer; 2008 [cited 2021 Sep 16];30:1661–3. Available from: <https://link.springer.com/article/10.1007/s10529-008-9739-9>
21. Prabha L, Govindappa N, Adhikary L, Melarkode R, Sastry K. Identification of the dipeptidyl aminopeptidase responsible for N-terminal clipping of recombinant Exendin-4 precursor expressed in *Pichia pastoris*. *Protein Expr Purif*. Academic Press; 2009;64:155–61.
22. Ghosalkar A, Sahai V, Srivastava A. Secretory expression of interferon-alpha 2b in recombinant *Pichia pastoris* using three different secretion signals. *Protein Expr Purif*. Academic Press; 2008;60:103–9.
23. Wang X, Zhu M, Zhang A, Yang F, Chen P. Synthesis and secretory expression of hybrid antimicrobial peptide CecA–mag and its mutants in *Pichia pastoris*: <https://doi.org/10.1258/ebm2011011153> [Internet]. SAGE PublicationsSage UK: London, England; 2012 [cited 2021 Sep 16];237:312–7. Available from: <https://journals.sagepub.com/doi/full/10.1258/ebm.2011.011153>
24. Neiers F, Belloir C, Poirier N, Naumer C, Krohn M, Briand L. Comparison of Different Signal Peptides for the Efficient Secretion of the Sweet-Tasting Plant Protein Brazzein in *Pichia pastoris*. *Life* 2021, Vol 11, Page 46 [Internet]. Multidisciplinary Digital Publishing Institute; 2021 [cited 2021 Sep 16];11:46. Available from: <https://www.mdpi.com/2075-1729/11/1/46/html>
25. Wang D, Ren H, Xu J-W, Sun P-D, Fang X-D. Expression, purification and characterization of human interferon- $\gamma$  in *Pichia pastoris*. *Mol Med Rep* [Internet]. Spandidos Publications; 2014 [cited 2021 Sep 16];9:715–9. Available from: <http://www.spandidos-publications.com/10.3892/mmr.2013.1812/abstract>
26. Liang S, Li C, Ye Y, Lin Y. Endogenous signal peptides efficiently mediate the secretion of recombinant proteins in *Pichia pastoris*. *Biotechnol Lett* [Internet]. Springer Netherlands; 2013 [cited 2017 Oct 3];35:97–105. Available from: <http://link.springer.com/10.1007/s10529-012-1055-8>

27. Hong P, Koza S, Bouvier ESP. A review size-exclusion chromatography for the analysis of protein biotherapeutics and their aggregates [Internet]. *J. Liq. Chromatogr. Relat. Technol.* Taylor & Francis Group; 2012 [cited 2022 Apr 25]. p. 2923–50. Available from: <https://www.tandfonline.com/doi/abs/10.1080/10826076.2012.743724>
28. Chen W-H, Hotez PJ, Bottazzi ME. Potential for developing a SARS-CoV receptor-binding domain (RBD) recombinant protein as a heterologous human vaccine against coronavirus infectious disease (COVID)-19. *Hum Vaccin Immunother* [Internet]. Taylor and Francis Inc.; 2020 [cited 2020 Dec 28];16:1239–42. Available from: <https://www.tandfonline.com/doi/full/10.1080/21645515.2020.1740560>
29. Dalvie NC, Biedermann AM, Rodriguez-Aponte SA, Naranjo CA, Rao HD, Rajurkar MP, et al. Scalable, methanol-free manufacturing of the SARS-CoV-2 receptor binding domain in engineered *Komagataella phaffii*. *bioRxiv* [Internet]. Cold Spring Harbor Laboratory; 2021 [cited 2021 May 10];2021.04.15.440035. Available from: <https://doi.org/10.1101/2021.04.15.440035>
30. Dalvie NC, Rodriguez-Aponte SA, Hartwell BL, Tostanoski LH, Biedermann AM, Crowell LE, et al. Engineered SARS-CoV-2 receptor binding domain improves manufacturability in yeast and immunogenicity in mice. *Proc Natl Acad Sci U S A* [Internet]. National Academy of Sciences; 2021 [cited 2021 Sep 8];118. Available from: <https://www.pnas.org/content/118/38/e2106845118>
31. Dalvie NC, Tostanoski LH, Rodriguez-Aponte SA, Kaur K, Bajoria S, Kumru OS, et al. A modular protein subunit vaccine candidate produced in yeast confers protection against SARS-CoV-2 in non-human primates. *bioRxiv* [Internet]. Cold Spring Harbor Laboratory; 2021 [cited 2021 Sep 16];2021.07.13.452251. Available from: <https://www.biorxiv.org/content/10.1101/2021.07.13.452251v1>
32. Tan TK, Rijal P, Rahikainen R, Keeble AH, Schimanski L, Hussain S, et al. A COVID-19 vaccine candidate using SpyCatcher multimerization of the SARS-CoV-2 spike protein receptor-binding domain induces potent neutralising antibody responses. *Nat Commun* [Internet]. Nature Publishing Group; 2021 [cited 2021 Feb 1];12:542. Available from: <http://www.nature.com/articles/s41467-020-20654-7>
33. Wen X, Wen K, Cao D, Li G, Jones RW, Li J, et al. Inclusion of a universal tetanus toxoid CD4+ T cell epitope P2 significantly enhanced the immunogenicity of recombinant rotavirus

$\Delta$ VP8\* subunit parenteral vaccines. *Vaccine* [Internet]. Elsevier; 2014 [cited 2018 Oct 24];32:4420–7. Available from:

<https://www.sciencedirect.com/science/article/pii/S0264410X14008615>

34. Aggarwal S, Mishra S. Modifications in the Kex2 P1' cleavage site in the  $\alpha$ -MAT secretion signal lead to higher production of human granulocyte colony-stimulating factor in *Pichia pastoris*. *World J Microbiol Biotechnol* [Internet]. Springer Science and Business Media B.V.; 2021 [cited 2022 Mar 15];37:1–10. Available from:

<https://link.springer.com/article/10.1007/s11274-021-03167-3>

35. Bevan A, Brenner C, Fuller RS. Quantitative assessment of enzyme specificity in vivo: P2 recognition by Kex2 protease defined in a genetic system. *Proc Natl Acad Sci U S A* [Internet]. 1998 [cited 2022 Mar 15];95:10384–9. Available from: [www.pnas.org](http://www.pnas.org).

36. Zhao X, Xie W, Lin Y, Lin X, Zheng S, Han S. Combined strategies for improving the heterologous expression of an alkaline lipase from *Acinetobacter radioresistens* CMC-1 in *Pichia pastoris*. *Process Biochem*. Elsevier; 2013;48:1317–23.

37. Huang CJ, Lin H, Yang X. Industrial production of recombinant therapeutics in *Escherichia coli* and its recent advancements. *J Ind Microbiol Biotechnol* [Internet]. Oxford Academic; 2012 [cited 2022 Jun 16];39:383–99. Available from:

<https://academic.oup.com/jimb/article/39/3/383/5994493>

38. Jenkins N. Modifications of therapeutic proteins: Challenges and prospects. *Cytotechnology* [Internet]. Springer; 2007 [cited 2022 Jun 16];53:121–5. Available from:

<https://link.springer.com/article/10.1007/s10616-007-9075-2>

39. Brady JR, Whittaker CA, Tan MC, Kristensen DL, Ma D, Dalvie NC, et al. Comparative genome-scale analysis of *Pichia pastoris* variants informs selection of an optimal base strain. *Biotechnol Bioeng* [Internet]. 2020 [cited 2020 Jan 20];117:543–55. Available from:

<https://onlinelibrary.wiley.com/doi/abs/10.1002/bit.27209>
